# Supplementary material for: High-affinity CD16 integration into a CRISPR/Cas9-edited CD38 locus augments CD38-directed antitumor activity of primary human natural killer cells
Source: HighWire-hosted journal article supplement (doi:10.1136/jitc-2021-003804), 2022-02-01
Supplement: jitc-2021-003804supp001_data_supplement.pdf [file jitc-2021-003804supp001_data_supplement.pdf]

## Supplemental Figures and Tables

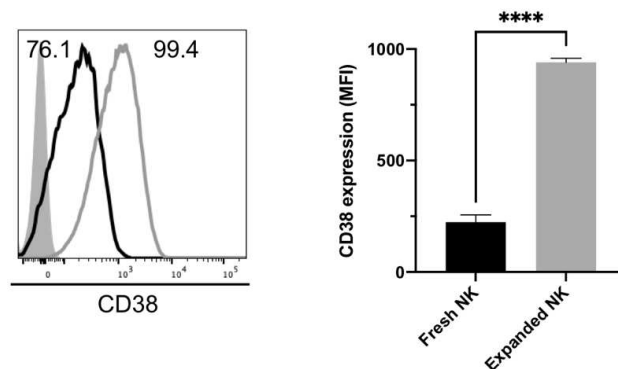

**Supplemental Figure 1.** CD38 is expressed by peripheral blood NK cells and increases with *ex vivo* expansion. Representative flow cytometry histograms and pooled data showing relative CD38 expression in freshly isolated NK cells (black) compared to NK cells after 7 days of *ex vivo* expansion with irradiated LCL feeder cells in IL-2 containing media (grey) ( $n = 3$  donors). Statistics determined with the Student's *t*-test, two tailed, \*\*\*\*  $p < 0.0001$ .

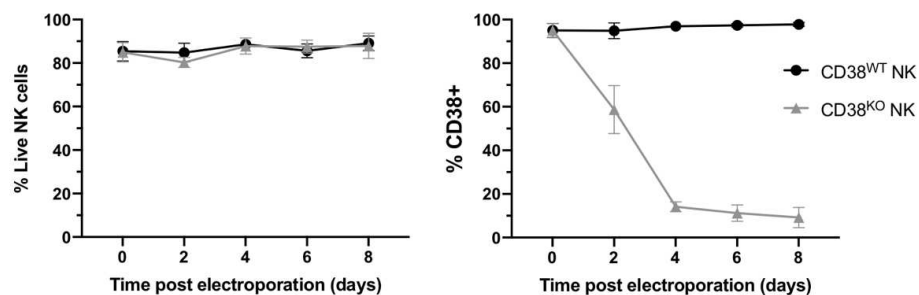

**Supplemental Figure 2.** NK cell viability and kinetics of CD38 expression following CD38 KO. Viability (determined by Live/Dead and Annexin V) and CD38 expression of *ex vivo* expanded CD38<sup>WT</sup> and CD38<sup>KO</sup> NK cells were examined by flow cytometry over time following CD38 KO ( $n = 6$  donors).

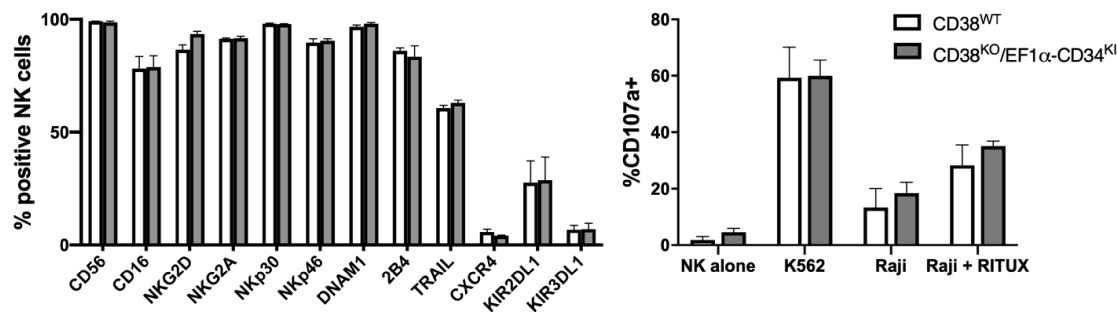

**Supplemental Figure 3.** Phenotypic and functional characterization of ex vivo expanded NK cells following combined CD38 KO/CD34 KI. Expression of a panel of NK cell surface markers examined by flow cytometry in CD38<sup>KO</sup>/CD34<sup>KI</sup> and unedited control NK cells ( $n = 3$  donors). NK cell degranulation (measured by CD107a expression) was also examined by flow cytometry following coculture of NK cells with K562 and Raji tumor cells with and without rituximab (RITUX) ( $n = 3$  donors).

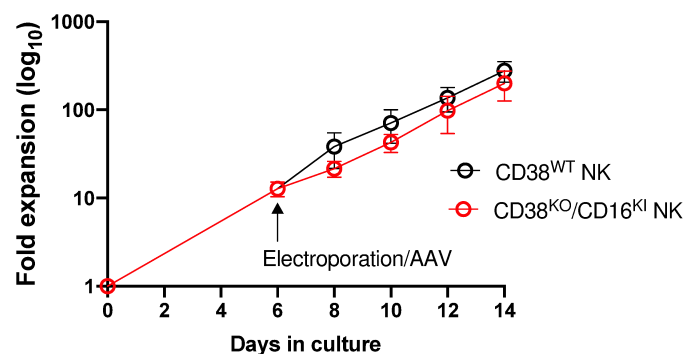

**Supplemental Figure 4.** Cell numbers during expansion of CD38<sup>KO</sup>/CD16<sup>KI</sup> and CD38<sup>WT</sup> NK cells were tracked over time ( $n = 3$  donors).

| Primer name | Forward                      | Reverse                      |
|-------------|------------------------------|------------------------------|
| CD38        | 5'-ACCCCTGGTAGACTGCATGTT-3'  | 5'-TCTCTCTTAGCTCCCTTCTCCA-3' |
| OFF-1       | 5'-CTGGACTCAAGGGATGAGGACA-3' | 5'-CTCGGAGAAGTTGGTGTTCCG-3'  |
| OFF-2       | 5'-GTTTCCCTAAGCTTTGCTGGC-3'  | 5'-AAGGCCAGGAGGTTCTTCA-3'    |
| OFF-3       | 5'-CTTGACCTGTCAGCTTGGCTA-3'  | 5'-GAACCACTGGAACCTCTTGGCA-3' |
| OFF-4       | 5'-GTGGGACAAGGGTCTTCACAG-3'  | 5'-GTGACCAGTATCATGCCACCT-3'  |
| OFF-5       | 5'-TCTGGGAGGAAATTTGAGGGC-3'  | 5'-GCATTTCCCGCAGAGGAGA-3'    |

**Supplemental Table 1.** Primer sequences used for off-target analysis, including primer sets for the on-target CD38 site and 5 off-target sites.
